# Supplementary material for: Development and validation of search filters to find articles on palliative care in bibliographic databases
Source: PubMed Central journal article supplement — Palliat Med. 2019 Jan 28;33(4):470–4. doi: 10.1177/0269216318824275 (PMC6439930; doi:10.1177/0269216318824275), 2019-01-28
Supplement: 824275_Supplemental_table_1.pdf [file 824275_Supplemental_table_1.pdf]

**Supplemental table 1 – potentially relevant search terms**

| <b>term</b>             | <b># of relevant references found</b> | <b># of irrelevant references found</b> | <b>sensitivity</b> | <b>specificity</b> | <b>precision</b> | <b>accuracy</b> |
|-------------------------|---------------------------------------|-----------------------------------------|--------------------|--------------------|------------------|-----------------|
| palliative*[tw]         | 169                                   | 3                                       | 67,1%              | 99,1%              | 98,3%            | 85,7%           |
| palliative              | 177                                   | 15                                      | 70,2%              | 95,7%              | 92,2%            | 85,0%           |
| "palliative care"[tw]   | 162                                   | 3                                       | 64,3%              | 99,1%              | 98,2%            | 84,5%           |
| care[tw]                | 222                                   | 64                                      | 88,1%              | 81,6%              | 77,6%            | 84,3%           |
| care*[tw]               | 224                                   | 68                                      | 88,9%              | 80,5%              | 76,7%            | 84,0%           |
| "palliative care"       | 168                                   | 13                                      | 66,7%              | 96,3%              | 92,8%            | 83,8%           |
| care[tiab]              | 194                                   | 44                                      | 77,0%              | 87,4%              | 81,5%            | 83,0%           |
| care                    | 229                                   | 79                                      | 90,9%              | 77,3%              | 74,4%            | 83,0%           |
| care*[tiab]             | 198                                   | 49                                      | 78,6%              | 85,9%              | 80,2%            | 82,8%           |
| care*                   | 230                                   | 83                                      | 91,3%              | 76,1%              | 73,5%            | 82,5%           |
| palliative*[tiab]       | 141                                   | 1                                       | 56,0%              | 99,7%              | 99,3%            | 81,3%           |
| "Palliative Care"[mh]   | 143                                   | 3                                       | 56,7%              | 99,1%              | 97,9%            | 81,3%           |
| "Palliative Care"[mj]   | 127                                   | 2                                       | 50,4%              | 99,4%              | 98,4%            | 78,8%           |
| care*[ti]               | 130                                   | 5                                       | 51,6%              | 98,6%              | 96,3%            | 78,8%           |
| "palliative care"[tiab] | 119                                   | 1                                       | 47,2%              | 99,7%              | 99,2%            | 77,7%           |
| care[ti]                | 118                                   | 4                                       | 46,8%              | 98,9%              | 96,7%            | 77,0%           |
| "Terminal Care"[mh]     | 92                                    | 0                                       | 36,5%              | 100,0%             | 100,0%           | 73,3%           |
| life[tw]                | 133                                   | 42                                      | 52,8%              | 87,9%              | 76,0%            | 73,2%           |
| life                    | 134                                   | 43                                      | 53,2%              | 87,6%              | 75,7%            | 73,2%           |
| life[tiab]              | 123                                   | 36                                      | 48,8%              | 89,7%              | 77,4%            | 72,5%           |
| termin*                 | 95                                    | 14                                      | 37,7%              | 96,0%              | 87,2%            | 71,5%           |
| termin*[tw]             | 95                                    | 14                                      | 37,7%              | 96,0%              | 87,2%            | 71,5%           |
| "end of life"           | 74                                    | 0                                       | 29,4%              | 100,0%             | 100,0%           | 70,3%           |
| nurs*                   | 98                                    | 25                                      | 38,9%              | 92,8%              | 79,7%            | 70,2%           |
| end                     | 85                                    | 13                                      | 33,7%              | 96,3%              | 86,7%            | 70,0%           |
| end[tw]                 | 84                                    | 13                                      | 33,3%              | 96,3%              | 86,6%            | 69,8%           |
| hospice*                | 71                                    | 1                                       | 28,2%              | 99,7%              | 98,6%            | 69,7%           |
| "end of"                | 77                                    | 7                                       | 30,6%              | 98,0%              | 91,7%            | 69,7%           |
| end*[tw]                | 84                                    | 15                                      | 33,3%              | 95,7%              | 84,8%            | 69,5%           |
| "palliative medicine"   | 76                                    | 10                                      | 30,2%              | 97,1%              | 88,4%            | 69,0%           |
| death[tw]               | 81                                    | 16                                      | 32,1%              | 95,4%              | 83,5%            | 68,8%           |
| death*[tw]              | 84                                    | 19                                      | 33,3%              | 94,5%              | 81,6%            | 68,8%           |
| death                   | 81                                    | 17                                      | 32,1%              | 95,1%              | 82,7%            | 68,7%           |
| patient*[tiab]          | 198                                   | 134                                     | 78,6%              | 61,5%              | 59,6%            | 68,7%           |
| "psychology"[sh]        | 101                                   | 39                                      | 40,1%              | 88,8%              | 72,1%            | 68,3%           |
| patient                 | 203                                   | 141                                     | 80,6%              | 59,5%              | 59,0%            | 68,3%           |
| "Aged"[mh]              | 112                                   | 51                                      | 44,4%              | 85,3%              | 68,7%            | 68,2%           |
| patient*[tw]            | 203                                   | 142                                     | 80,6%              | 59,2%              | 58,8%            | 68,2%           |

|                         |     |    |       |        |        |       |
|-------------------------|-----|----|-------|--------|--------|-------|
| "terminal care"[tw]     | 60  | 0  | 23,8% | 100,0% | 100,0% | 68,0% |
| psychology*[tw]         | 102 | 42 | 40,5% | 87,9%  | 70,8%  | 68,0% |
| hospice*[tw]            | 58  | 0  | 23,0% | 100,0% | 100,0% | 67,7% |
| attitude[tw]            | 73  | 15 | 29,0% | 95,7%  | 83,0%  | 67,7% |
| death*[tiab]            | 72  | 16 | 28,6% | 95,4%  | 81,8%  | 67,3% |
| death[tiab]             | 68  | 13 | 27,0% | 96,3%  | 84,0%  | 67,2% |
| nurs*[tw]               | 67  | 15 | 26,6% | 95,7%  | 81,7%  | 66,7% |
| ill*[tw]                | 75  | 23 | 29,8% | 93,4%  | 76,5%  | 66,7% |
| patient[tw]             | 126 | 74 | 50,0% | 78,7%  | 63,0%  | 66,7% |
| cancer*[tiab]           | 99  | 48 | 39,3% | 86,2%  | 67,3%  | 66,5% |
| patient*                | 129 | 78 | 51,2% | 77,6%  | 62,3%  | 66,5% |
| "Neoplasms"[mh:noexp]   | 68  | 18 | 27,0% | 94,8%  | 79,1%  | 66,3% |
| "Aged, 80 and over"[mh] | 69  | 19 | 27,4% | 94,5%  | 78,4%  | 66,3% |
| family*                 | 74  | 24 | 29,4% | 93,1%  | 75,5%  | 66,3% |
| cancer[tiab]            | 96  | 47 | 38,1% | 86,5%  | 67,1%  | 66,2% |
| need*[tw]               | 110 | 61 | 43,7% | 82,5%  | 64,3%  | 66,2% |
| life*[ti]               | 52  | 4  | 20,6% | 98,9%  | 92,9%  | 66,0% |
| family*[tw]             | 70  | 22 | 27,8% | 93,7%  | 76,1%  | 66,0% |
| attitude*[tw]           | 77  | 29 | 30,6% | 91,7%  | 72,6%  | 66,0% |
| life[ti]                | 51  | 4  | 20,2% | 98,9%  | 92,7%  | 65,8% |
| cancer*                 | 103 | 56 | 40,9% | 83,9%  | 64,8%  | 65,8% |
| "life care"             | 45  | 0  | 17,9% | 100,0% | 100,0% | 65,5% |
| nurs*[tiab]             | 53  | 8  | 21,0% | 97,7%  | 86,9%  | 65,5% |
| ill*[tiab]              | 57  | 12 | 22,6% | 96,6%  | 82,6%  | 65,5% |
| patient*[ti]            | 76  | 31 | 30,2% | 91,1%  | 71,0%  | 65,5% |
| need*[tiab]             | 103 | 58 | 40,9% | 83,3%  | 64,0%  | 65,5% |
| end[ti]                 | 43  | 0  | 17,1% | 100,0% | 100,0% | 65,2% |
| ill                     | 46  | 3  | 18,3% | 99,1%  | 93,9%  | 65,2% |
| ill[tw]                 | 46  | 3  | 18,3% | 99,1%  | 93,9%  | 65,2% |
| "attitude to"[tw]       | 49  | 7  | 19,4% | 98,0%  | 87,5%  | 65,0% |
| profess*                | 57  | 15 | 22,6% | 95,7%  | 79,2%  | 65,0% |
| ill*                    | 50  | 9  | 19,8% | 97,4%  | 84,7%  | 64,8% |
| service*[tw]            | 71  | 30 | 28,2% | 91,4%  | 70,3%  | 64,8% |
| service*                | 79  | 38 | 31,3% | 89,1%  | 67,5%  | 64,8% |
| patient[tiab]           | 98  | 57 | 38,9% | 83,6%  | 63,2%  | 64,8% |
| cancer                  | 112 | 71 | 44,4% | 79,6%  | 61,2%  | 64,8% |
| "health care"[tw]       | 72  | 32 | 28,6% | 90,8%  | 69,2%  | 64,7% |
| "health care"           | 74  | 34 | 29,4% | 90,2%  | 68,5%  | 64,7% |
| home*[tiab]             | 45  | 6  | 17,9% | 98,3%  | 88,2%  | 64,5% |
| home*[tw]               | 47  | 8  | 18,7% | 97,7%  | 85,5%  | 64,5% |
| neoplasm*[tw]           | 89  | 50 | 35,3% | 85,6%  | 64,0%  | 64,5% |
| "end of"[ti]            | 38  | 0  | 15,1% | 100,0% | 100,0% | 64,3% |
| home                    | 42  | 4  | 16,7% | 98,9%  | 91,3%  | 64,3% |
| home*                   | 44  | 6  | 17,5% | 98,3%  | 88,0%  | 64,3% |
| "Neoplasms"[mj:noexp]   | 54  | 16 | 21,4% | 95,4%  | 77,1%  | 64,3% |

|                                          |     |     |       |        |        |       |
|------------------------------------------|-----|-----|-------|--------|--------|-------|
| nurs                                     | 54  | 16  | 21,4% | 95,4%  | 77,1%  | 64,3% |
| "terminally ill"[tw]                     | 37  | 0   | 14,7% | 100,0% | 100,0% | 64,2% |
| sett*[tiab]                              | 54  | 17  | 21,4% | 95,1%  | 76,1%  | 64,2% |
| family*[tiab]                            | 56  | 20  | 22,2% | 94,3%  | 73,7%  | 64,0% |
| symptom*[tiab]                           | 71  | 35  | 28,2% | 89,9%  | 67,0%  | 64,0% |
| "health personnel"[tw]                   | 41  | 6   | 16,3% | 98,3%  | 87,2%  | 63,8% |
| family[tiab]                             | 55  | 20  | 21,8% | 94,3%  | 73,3%  | 63,8% |
| "Attitude of Health Personnel"[mh:noexp] | 36  | 2   | 14,3% | 99,4%  | 94,7%  | 63,7% |
| "Palliative Care/methods"[mh]            | 36  | 2   | 14,3% | 99,4%  | 94,7%  | 63,7% |
| "attitude of health personnel"[tw]       | 36  | 2   | 14,3% | 99,4%  | 94,7%  | 63,7% |
| advanced[tiab]                           | 42  | 8   | 16,7% | 97,7%  | 84,0%  | 63,7% |
| personnel*[tw]                           | 43  | 9   | 17,1% | 97,4%  | 82,7%  | 63,7% |
| symptom*                                 | 99  | 65  | 39,3% | 81,3%  | 60,4%  | 63,7% |
| "hospice care"                           | 33  | 0   | 13,1% | 100,0% | 100,0% | 63,5% |
| "care and"                               | 39  | 6   | 15,5% | 98,3%  | 86,7%  | 63,5% |
| profess*[tiab]                           | 45  | 12  | 17,9% | 96,6%  | 78,9%  | 63,5% |
| design[tw]                               | 50  | 17  | 19,8% | 95,1%  | 74,6%  | 63,5% |
| "standards"[sh]                          | 52  | 19  | 20,6% | 94,5%  | 73,2%  | 63,5% |
| interview*[tiab]                         | 53  | 20  | 21,0% | 94,3%  | 72,6%  | 63,5% |
| "Neoplasms"[mh]                          | 88  | 55  | 34,9% | 84,2%  | 61,5%  | 63,5% |
| "Attitude to Death"[mh]                  | 32  | 0   | 12,7% | 100,0% | 100,0% | 63,3% |
| "attitude to death"[tw]                  | 32  | 0   | 12,7% | 100,0% | 100,0% | 63,3% |
| "Attitude of Health Personnel"[mh]       | 38  | 6   | 15,1% | 98,3%  | 86,4%  | 63,3% |
| service*[tiab]                           | 52  | 20  | 20,6% | 94,3%  | 72,2%  | 63,3% |
| health[tw]                               | 150 | 118 | 59,5% | 66,1%  | 56,0%  | 63,3% |
| "care and"[tiab]                         | 34  | 3   | 13,5% | 99,1%  | 91,9%  | 63,2% |
| "care in"[tiab]                          | 34  | 3   | 13,5% | 99,1%  | 91,9%  | 63,2% |
| questionnaire                            | 61  | 30  | 24,2% | 91,4%  | 67,0%  | 63,2% |
| experience*[tiab]                        | 72  | 41  | 28,6% | 88,2%  | 63,7%  | 63,2% |
| health                                   | 162 | 131 | 64,3% | 62,4%  | 55,3%  | 63,2% |
| "cancer patients"[tiab]                  | 38  | 8   | 15,1% | 97,7%  | 82,6%  | 63,0% |
| termin*[tiab]                            | 43  | 13  | 17,1% | 96,3%  | 76,8%  | 63,0% |
| interview*                               | 53  | 23  | 21,0% | 93,4%  | 69,7%  | 63,0% |
| interview*[tw]                           | 53  | 23  | 21,0% | 93,4%  | 69,7%  | 63,0% |
| cancer[ti]                               | 58  | 28  | 23,0% | 92,0%  | 67,4%  | 63,0% |
| pain                                     | 90  | 60  | 35,7% | 82,8%  | 60,0%  | 63,0% |
| health*                                  | 169 | 139 | 67,1% | 60,1%  | 54,9%  | 63,0% |
| caregiver*[tw]                           | 29  | 0   | 11,5% | 100,0% | 100,0% | 62,8% |
| design[tiab]                             | 45  | 16  | 17,9% | 95,4%  | 73,8%  | 62,8% |
| cancer*[ti]                              | 59  | 30  | 23,4% | 91,4%  | 66,3%  | 62,8% |
| health*[tw]                              | 153 | 124 | 60,7% | 64,4%  | 55,2%  | 62,8% |
| "Hospice Care"[mh]                       | 28  | 0   | 11,1% | 100,0% | 100,0% | 62,7% |
| "Palliative Care/methods"[mj]            | 29  | 1   | 11,5% | 99,7%  | 96,7%  | 62,7% |
| die*[tw]                                 | 35  | 7   | 13,9% | 98,0%  | 83,3%  | 62,7% |

|                                          |     |    |       |        |        |       |
|------------------------------------------|-----|----|-------|--------|--------|-------|
| "palliative care"[ad]                    | 40  | 12 | 15,9% | 96,6%  | 76,9%  | 62,7% |
| communication                            | 44  | 16 | 17,5% | 95,4%  | 73,3%  | 62,7% |
| unit*[tw]                                | 68  | 40 | 27,0% | 88,5%  | 63,0%  | 62,7% |
| "Terminally Ill"[mh]                     | 27  | 0  | 10,7% | 100,0% | 100,0% | 62,5% |
| "advanced cancer"[tiab]                  | 27  | 0  | 10,7% | 100,0% | 100,0% | 62,5% |
| die*                                     | 37  | 10 | 14,7% | 97,1%  | 78,7%  | 62,5% |
| communication*                           | 40  | 13 | 15,9% | 96,3%  | 75,5%  | 62,5% |
| illness*[tiab]                           | 31  | 5  | 12,3% | 98,6%  | 86,1%  | 62,3% |
| assess*[tw]                              | 100 | 74 | 39,7% | 78,7%  | 57,5%  | 62,3% |
| illness[tiab]                            | 30  | 5  | 11,9% | 98,6%  | 85,7%  | 62,2% |
| communication[tw]                        | 37  | 12 | 14,7% | 96,6%  | 75,5%  | 62,2% |
| "patients and"[tiab]                     | 38  | 13 | 15,1% | 96,3%  | 74,5%  | 62,2% |
| "Neoplasms/complications"[mh]            | 40  | 15 | 15,9% | 95,7%  | 72,7%  | 62,2% |
| explore*[tiab]                           | 41  | 16 | 16,3% | 95,4%  | 71,9%  | 62,2% |
| illness*[tw]                             | 42  | 17 | 16,7% | 95,1%  | 71,2%  | 62,2% |
| "Caregivers"[mh]                         | 24  | 0  | 9,5%  | 100,0% | 100,0% | 62,0% |
| "care services"                          | 26  | 2  | 10,3% | 99,4%  | 92,9%  | 62,0% |
| illness*                                 | 42  | 18 | 16,7% | 94,8%  | 70,0%  | 62,0% |
| symptom[tiab]                            | 43  | 19 | 17,1% | 94,5%  | 69,4%  | 62,0% |
| physic*[tw]                              | 64  | 40 | 25,4% | 88,5%  | 61,5%  | 62,0% |
| "Neoplasms"[mj]                          | 73  | 49 | 29,0% | 85,9%  | 59,8%  | 62,0% |
| "Attitude of Health Personnel"[mj:noexp] | 23  | 0  | 9,1%  | 100,0% | 100,0% | 61,8% |
| "Palliative Care/psychology"[mh]         | 23  | 0  | 9,1%  | 100,0% | 100,0% | 61,8% |
| "Questionnaires"[mh]                     | 43  | 20 | 17,1% | 94,3%  | 68,3%  | 61,8% |
| "Attitude to Health"[mh]                 | 55  | 32 | 21,8% | 90,8%  | 63,2%  | 61,8% |
| design*[tw]                              | 60  | 37 | 23,8% | 89,4%  | 61,9%  | 61,8% |
| inform*[tiab]                            | 60  | 37 | 23,8% | 89,4%  | 61,9%  | 61,8% |
| symptom                                  | 76  | 53 | 30,2% | 84,8%  | 58,9%  | 61,8% |
| bereave*                                 | 22  | 0  | 8,7%  | 100,0% | 100,0% | 61,7% |
| spiritual*[tw]                           | 23  | 1  | 9,1%  | 99,7%  | 95,8%  | 61,7% |
| "care services"[tw]                      | 23  | 1  | 9,1%  | 99,7%  | 95,8%  | 61,7% |
| "Neoplasms/complications"[mj]            | 29  | 7  | 11,5% | 98,0%  | 80,6%  | 61,7% |
| receive*[tiab]                           | 42  | 20 | 16,7% | 94,3%  | 67,7%  | 61,7% |
| identify*[tiab]                          | 48  | 26 | 19,0% | 92,5%  | 64,9%  | 61,7% |
| inform*[tw]                              | 63  | 41 | 25,0% | 88,2%  | 60,6%  | 61,7% |
| "Attitude of Health Personnel"[mj]       | 23  | 2  | 9,1%  | 99,4%  | 92,0%  | 61,5% |
| specialis*                               | 27  | 6  | 10,7% | 98,3%  | 81,8%  | 61,5% |
| participant*[tiab]                       | 44  | 23 | 17,5% | 93,4%  | 65,7%  | 61,5% |
| "patients with"[tiab]                    | 70  | 49 | 27,8% | 85,9%  | 58,8%  | 61,5% |
| specialis*[tiab]                         | 23  | 3  | 9,1%  | 99,1%  | 88,5%  | 61,3% |
| nurs*[ti]                                | 24  | 4  | 9,5%  | 98,9%  | 85,7%  | 61,3% |
| "patient relations"[tw]                  | 24  | 4  | 9,5%  | 98,9%  | 85,7%  | 61,3% |
| qualitative                              | 34  | 14 | 13,5% | 96,0%  | 70,8%  | 61,3% |
| qualitative[tw]                          | 34  | 14 | 13,5% | 96,0%  | 70,8%  | 61,3% |

|                                     |     |    |       |        |        |       |
|-------------------------------------|-----|----|-------|--------|--------|-------|
| unit*[tiab]                         | 41  | 21 | 16,3% | 94,0%  | 66,1%  | 61,3% |
| conduct*[tw]                        | 49  | 29 | 19,4% | 91,7%  | 62,8%  | 61,3% |
| need[tiab]                          | 51  | 31 | 20,2% | 91,1%  | 62,2%  | 61,3% |
| physic*[tiab]                       | 57  | 37 | 22,6% | 89,4%  | 60,6%  | 61,3% |
| over[tw]                            | 97  | 77 | 38,5% | 77,9%  | 55,7%  | 61,3% |
| "care for"[tiab]                    | 20  | 1  | 7,9%  | 99,7%  | 95,2%  | 61,2% |
| "Neoplasms/psychology"[mh:noexp]    | 23  | 4  | 9,1%  | 98,9%  | 85,2%  | 61,2% |
| team                                | 23  | 4  | 9,1%  | 98,9%  | 85,2%  | 61,2% |
| team*                               | 26  | 7  | 10,3% | 98,0%  | 78,8%  | 61,2% |
| communication[tiab]                 | 28  | 9  | 11,1% | 97,4%  | 75,7%  | 61,2% |
| communication*[tiab]                | 29  | 10 | 11,5% | 97,1%  | 74,4%  | 61,2% |
| psychologic*[tw]                    | 33  | 14 | 13,1% | 96,0%  | 70,2%  | 61,2% |
| research[tiab]                      | 58  | 39 | 23,0% | 88,8%  | 59,8%  | 61,2% |
| provide*[tiab]                      | 84  | 65 | 33,3% | 81,3%  | 56,4%  | 61,2% |
| "Middle Aged"[mh]                   | 107 | 88 | 42,5% | 74,7%  | 54,9%  | 61,2% |
| "middle aged"[tw]                   | 107 | 88 | 42,5% | 74,7%  | 54,9%  | 61,2% |
| die                                 | 20  | 2  | 7,9%  | 99,4%  | 90,9%  | 61,0% |
| die[tw]                             | 20  | 2  | 7,9%  | 99,4%  | 90,9%  | 61,0% |
| team[tw]                            | 21  | 3  | 8,3%  | 99,1%  | 87,5%  | 61,0% |
| team*[tw]                           | 24  | 6  | 9,5%  | 98,3%  | 80,0%  | 61,0% |
| "Neoplasms/psychology"[mh]          | 25  | 7  | 9,9%  | 98,0%  | 78,1%  | 61,0% |
| "Neoplasms/complications"[mh:noexp] | 29  | 11 | 11,5% | 96,8%  | 72,5%  | 61,0% |
| qualitative[tiab]                   | 29  | 11 | 11,5% | 96,8%  | 72,5%  | 61,0% |
| physician*[tw]                      | 37  | 19 | 14,7% | 94,5%  | 66,1%  | 61,0% |
| objective*[tiab]                    | 45  | 27 | 17,9% | 92,2%  | 62,5%  | 61,0% |
| objective*[tw]                      | 46  | 28 | 18,3% | 92,0%  | 62,2%  | 61,0% |
| over*[tw]                           | 99  | 81 | 39,3% | 76,7%  | 55,0%  | 61,0% |
| middle*                             | 108 | 90 | 42,9% | 74,1%  | 54,5%  | 61,0% |
| inpatient*[tiab]                    | 18  | 1  | 7,1%  | 99,7%  | 94,7%  | 60,8% |
| inpatient                           | 19  | 2  | 7,5%  | 99,4%  | 90,5%  | 60,8% |
| suffer                              | 19  | 2  | 7,5%  | 99,4%  | 90,5%  | 60,8% |
| "health services"[tw]               | 28  | 11 | 11,1% | 96,8%  | 71,8%  | 60,8% |
| "Quality of Life"[mh]               | 30  | 13 | 11,9% | 96,3%  | 69,8%  | 60,8% |
| "health care"[tiab]                 | 30  | 13 | 11,9% | 96,3%  | 69,8%  | 60,8% |
| identify[tiab]                      | 39  | 22 | 15,5% | 93,7%  | 63,9%  | 60,8% |
| inform*                             | 56  | 39 | 22,2% | 88,8%  | 58,9%  | 60,8% |
| pain[tw]                            | 62  | 45 | 24,6% | 87,1%  | 57,9%  | 60,8% |
| inpatient[tiab]                     | 16  | 0  | 6,3%  | 100,0% | 100,0% | 60,7% |
| "home care"[tw]                     | 16  | 0  | 6,3%  | 100,0% | 100,0% | 60,7% |
| skill*[tiab]                        | 21  | 5  | 8,3%  | 98,6%  | 80,8%  | 60,7% |
| "Attitude to Health"[mh:noexp]      | 22  | 6  | 8,7%  | 98,3%  | 78,6%  | 60,7% |
| "attitude to health"[tw]            | 22  | 6  | 8,7%  | 98,3%  | 78,6%  | 60,7% |
| physician[tw]                       | 24  | 8  | 9,5%  | 97,7%  | 75,0%  | 60,7% |
| explore[tiab]                       | 27  | 11 | 10,7% | 96,8%  | 71,1%  | 60,7% |
| physician*                          | 37  | 21 | 14,7% | 94,0%  | 63,8%  | 60,7% |

|                                     |    |    |       |        |        |       |
|-------------------------------------|----|----|-------|--------|--------|-------|
| "Bereavement"[mh]                   | 15 | 0  | 6,0%  | 100,0% | 100,0% | 60,5% |
| "Home Care Services"[mh]            | 15 | 0  | 6,0%  | 100,0% | 100,0% | 60,5% |
| "palliative care services"          | 15 | 0  | 6,0%  | 100,0% | 100,0% | 60,5% |
| dyspnea                             | 16 | 1  | 6,3%  | 99,7%  | 94,1%  | 60,5% |
| advanced[ti]                        | 17 | 2  | 6,7%  | 99,4%  | 89,5%  | 60,5% |
| death*[ti]                          | 17 | 2  | 6,7%  | 99,4%  | 89,5%  | 60,5% |
| "care team"[tw]                     | 17 | 2  | 6,7%  | 99,4%  | 89,5%  | 60,5% |
| "care team"                         | 18 | 3  | 7,1%  | 99,1%  | 85,7%  | 60,5% |
| "needs and"[tw]                     | 19 | 4  | 7,5%  | 98,9%  | 82,6%  | 60,5% |
| "Neoplasms/complications"[mj:noexp] | 20 | 5  | 7,9%  | 98,6%  | 80,0%  | 60,5% |
| satisfaction[tw]                    | 24 | 9  | 9,5%  | 97,4%  | 72,7%  | 60,5% |
| distress*                           | 25 | 10 | 9,9%  | 97,1%  | 71,4%  | 60,5% |
| distress*[tiab]                     | 25 | 10 | 9,9%  | 97,1%  | 71,4%  | 60,5% |
| five*[tiab]                         | 31 | 16 | 12,3% | 95,4%  | 66,0%  | 60,5% |
| physician                           | 35 | 20 | 13,9% | 94,3%  | 63,6%  | 60,5% |
| conduct                             | 52 | 37 | 20,6% | 89,4%  | 58,4%  | 60,5% |
| statistic*[tw]                      | 58 | 43 | 23,0% | 87,6%  | 57,4%  | 60,5% |
| research*[tiab]                     | 62 | 47 | 24,6% | 86,5%  | 56,9%  | 60,5% |
| "Stress, Psychological"[mh]         | 15 | 1  | 6,0%  | 99,7%  | 93,8%  | 60,3% |
| "care in"[ti]                       | 15 | 1  | 6,0%  | 99,7%  | 93,8%  | 60,3% |
| admission*                          | 18 | 4  | 7,1%  | 98,9%  | 81,8%  | 60,3% |
| admission*[tw]                      | 18 | 4  | 7,1%  | 98,9%  | 81,8%  | 60,3% |
| "cancer patients"[ti]               | 18 | 4  | 7,1%  | 98,9%  | 81,8%  | 60,3% |
| "Hospitalization"[mh]               | 19 | 5  | 7,5%  | 98,6%  | 79,2%  | 60,3% |
| "patients in"[tiab]                 | 22 | 8  | 8,7%  | 97,7%  | 73,3%  | 60,3% |
| service[tiab]                       | 23 | 9  | 9,1%  | 97,4%  | 71,9%  | 60,3% |
| them*[tiab]                         | 27 | 13 | 10,7% | 96,3%  | 67,5%  | 60,3% |
| questionnaire[tiab]                 | 34 | 20 | 13,5% | 94,3%  | 63,0%  | 60,3% |
| questionnaire*[tiab]                | 38 | 24 | 15,1% | 93,1%  | 61,3%  | 60,3% |
| death[ti]                           | 14 | 1  | 5,6%  | 99,7%  | 93,3%  | 60,2% |
| admission                           | 15 | 2  | 6,0%  | 99,4%  | 88,2%  | 60,2% |
| admission[tw]                       | 15 | 2  | 6,0%  | 99,4%  | 88,2%  | 60,2% |
| "death and"[tw]                     | 15 | 2  | 6,0%  | 99,4%  | 88,2%  | 60,2% |
| anxiety[tiab]                       | 16 | 3  | 6,3%  | 99,1%  | 84,2%  | 60,2% |
| team*[tiab]                         | 18 | 5  | 7,1%  | 98,6%  | 78,3%  | 60,2% |
| "completed the"[tiab]               | 18 | 5  | 7,1%  | 98,6%  | 78,3%  | 60,2% |
| "palliative medicine"[ad]           | 18 | 5  | 7,1%  | 98,6%  | 78,3%  | 60,2% |
| service[tw]                         | 24 | 11 | 9,5%  | 96,8%  | 68,6%  | 60,2% |
| physician*[tiab]                    | 29 | 16 | 11,5% | 95,4%  | 64,4%  | 60,2% |
| concern*[tiab]                      | 32 | 19 | 12,7% | 94,5%  | 62,7%  | 60,2% |
| issue*[tiab]                        | 35 | 22 | 13,9% | 93,7%  | 61,4%  | 60,2% |
| time[tiab]                          | 59 | 46 | 23,4% | 86,8%  | 56,2%  | 60,2% |
| "Hospitalization"[mj]               | 13 | 1  | 5,2%  | 99,7%  | 92,9%  | 60,0% |
| team[tiab]                          | 14 | 2  | 5,6%  | 99,4%  | 87,5%  | 60,0% |
| termin*[ti]                         | 14 | 2  | 5,6%  | 99,4%  | 87,5%  | 60,0% |

|                        |    |    |       |       |       |       |
|------------------------|----|----|-------|-------|-------|-------|
| ask*[tiab]             | 16 | 4  | 6,3%  | 98,9% | 80,0% | 60,0% |
| anxiety[tw]            | 17 | 5  | 6,7%  | 98,6% | 77,3% | 60,0% |
| meet*[tiab]            | 17 | 5  | 6,7%  | 98,6% | 77,3% | 60,0% |
| provis*[tiab]          | 17 | 5  | 6,7%  | 98,6% | 77,3% | 60,0% |
| objective[tiab]        | 33 | 21 | 13,1% | 94,0% | 61,1% | 60,0% |
| general                | 39 | 27 | 15,5% | 92,2% | 59,1% | 60,0% |
| discuss*[tiab]         | 42 | 30 | 16,7% | 91,4% | 58,3% | 60,0% |
| numeric*[tw]           | 43 | 31 | 17,1% | 91,1% | 58,1% | 60,0% |
| topic*[tw]             | 44 | 32 | 17,5% | 90,8% | 57,9% | 60,0% |
| "family members"[tiab] | 13 | 2  | 5,2%  | 99,4% | 86,7% | 59,8% |
| interview[tiab]        | 15 | 4  | 6,0%  | 98,9% | 78,9% | 59,8% |
| "care unit"            | 15 | 4  | 6,0%  | 98,9% | 78,9% | 59,8% |
| "patient care"[tw]     | 16 | 5  | 6,3%  | 98,6% | 76,2% | 59,8% |
| demand*[tw]            | 20 | 9  | 7,9%  | 97,4% | 69,0% | 59,8% |
| median[tiab]           | 20 | 9  | 7,9%  | 97,4% | 69,0% | 59,8% |
| perceive*[tiab]        | 20 | 9  | 7,9%  | 97,4% | 69,0% | 59,8% |
| distress[tiab]         | 21 | 10 | 8,3%  | 97,1% | 67,7% | 59,8% |
| service                | 26 | 15 | 10,3% | 95,7% | 63,4% | 59,8% |
| decis*[tw]             | 28 | 17 | 11,1% | 95,1% | 62,2% | 59,8% |
| status[tiab]           | 30 | 19 | 11,9% | 94,5% | 61,2% | 59,8% |
| score*[tiab]           | 33 | 22 | 13,1% | 93,7% | 60,0% | 59,8% |
| "numerical data"[tw]   | 38 | 27 | 15,1% | 92,2% | 58,5% | 59,8% |
| experience             | 39 | 28 | 15,5% | 92,0% | 58,2% | 59,8% |
| experience[tiab]       | 39 | 28 | 15,5% | 92,0% | 58,2% | 59,8% |
| "Quality of Life"[mj]  | 15 | 5  | 6,0%  | 98,6% | 75,0% | 59,7% |
| interview              | 20 | 10 | 7,9%  | 97,1% | 66,7% | 59,7% |
| whether[tiab]          | 29 | 19 | 11,5% | 94,5% | 60,4% | 59,7% |
| status*[tw]            | 37 | 27 | 14,7% | 92,2% | 57,8% | 59,7% |
| pain[tiab]             | 53 | 43 | 21,0% | 87,6% | 55,2% | 59,7% |
| psychosocial*          | 13 | 4  | 5,2%  | 98,9% | 76,5% | 59,5% |
| physician[tiab]        | 15 | 6  | 6,0%  | 98,3% | 71,4% | 59,5% |
| "data collection"[tw]  | 15 | 6  | 6,0%  | 98,3% | 71,4% | 59,5% |
| "Decision Making"[mh]  | 16 | 7  | 6,3%  | 98,0% | 69,6% | 59,5% |
| demand[tw]             | 16 | 7  | 6,3%  | 98,0% | 69,6% | 59,5% |
| participate*[tiab]     | 19 | 10 | 7,5%  | 97,1% | 65,5% | 59,5% |
| future*[tiab]          | 23 | 14 | 9,1%  | 96,0% | 62,2% | 59,5% |
| future                 | 24 | 15 | 9,5%  | 95,7% | 61,5% | 59,5% |
| decis*[tiab]           | 25 | 16 | 9,9%  | 95,4% | 61,0% | 59,5% |
| complete*[tiab]        | 39 | 30 | 15,5% | 91,4% | 56,5% | 59,5% |
| access[tiab]           | 14 | 6  | 5,6%  | 98,3% | 70,0% | 59,3% |
| unit[tiab]             | 18 | 10 | 7,1%  | 97,1% | 64,3% | 59,3% |
| assess*[tiab]          | 73 | 65 | 29,0% | 81,3% | 52,9% | 59,3% |
| physic*[ti]            | 13 | 6  | 5,2%  | 98,3% | 68,4% | 59,2% |
| psychologic*[tiab]     | 13 | 6  | 5,2%  | 98,3% | 68,4% | 59,2% |
| symptom[ti]            | 15 | 8  | 6,0%  | 97,7% | 65,2% | 59,2% |

|                                 |     |     |       |       |       |       |
|---------------------------------|-----|-----|-------|-------|-------|-------|
| assess*[ti]                     | 16  | 9   | 6,3%  | 97,4% | 64,0% | 59,2% |
| emot*[tw]                       | 16  | 9   | 6,3%  | 97,4% | 64,0% | 59,2% |
| "patients with"[ti]             | 21  | 14  | 8,3%  | 96,0% | 60,0% | 59,2% |
| "Attitude to Health"[mj]        | 24  | 17  | 9,5%  | 95,1% | 58,5% | 59,2% |
| scale*[tiab]                    | 35  | 28  | 13,9% | 92,0% | 55,6% | 59,2% |
| provide[tiab]                   | 40  | 33  | 15,9% | 90,5% | 54,8% | 59,2% |
| "Male"[mh]                      | 147 | 140 | 58,3% | 59,8% | 51,2% | 59,2% |
| "Adaptation, Psychological"[mh] | 13  | 7   | 5,2%  | 98,0% | 65,0% | 59,0% |
| facilitate*[tiab]               | 13  | 7   | 5,2%  | 98,0% | 65,0% | 59,0% |
| experience*[ti]                 | 15  | 9   | 6,0%  | 97,4% | 62,5% | 59,0% |
| "decision making"[tw]           | 16  | 10  | 6,3%  | 97,1% | 61,5% | 59,0% |
| attitude*[tiab]                 | 18  | 12  | 7,1%  | 96,6% | 60,0% | 59,0% |
| scale[tiab]                     | 31  | 25  | 12,3% | 92,8% | 55,4% | 59,0% |
| topic[tw]                       | 36  | 30  | 14,3% | 91,4% | 54,5% | 59,0% |
| male*[tw]                       | 148 | 142 | 58,7% | 59,2% | 51,0% | 59,0% |
| time*[tiab]                     | 62  | 57  | 24,6% | 83,6% | 52,1% | 58,8% |
| data[tw]                        | 95  | 92  | 37,7% | 73,6% | 50,8% | 58,5% |
| data*[tw]                       | 98  | 96  | 38,9% | 72,4% | 50,5% | 58,3% |
| time[tw]                        | 61  | 60  | 24,2% | 82,8% | 50,4% | 58,2% |
| age*[tw]                        | 150 | 162 | 59,5% | 53,4% | 48,1% | 56,0% |
| research                        | 162 | 183 | 64,3% | 47,4% | 47,0% | 54,5% |
| research[tw]                    | 151 | 174 | 59,9% | 50,0% | 46,5% | 54,2% |
| research*                       | 163 | 189 | 64,7% | 45,7% | 46,3% | 53,7% |
| research*[tw]                   | 152 | 180 | 60,3% | 48,3% | 45,8% | 53,3% |
| "Humans"[mh]                    | 246 | 307 | 97,6% | 11,8% | 44,5% | 47,8% |
| human                           | 246 | 315 | 97,6% | 9,5%  | 43,9% | 46,5% |
